# Supplementary material for: Spatial and temporal variations in seabird bycatch: Incidental bycatch in the Norwegian coastal gillnet-fishery
Source: PLoS One. 2019 Mar 13;14(3):e0212786. doi: 10.1371/journal.pone.0212786 (PMC6415787; doi:10.1371/journal.pone.0212786)
Supplement: S1 Equations — The mean stratified estimator is an estimator of bycatch per trip across all vessels. The GLMM was parameterised for both diving seabirds and surface feeding seabirds. (DOCX) [file pone.0212786.s001.docx]

**Supporting information**

**S1 Equations**

**Formulas for the mean stratified estimator**

For trip by a vessel in stratum let be the bycatch of seabirds in numbers.

An estimator for mean bycatch per trip across all vessels in is then

(1.1)

where is the total number of trips in area. An estimator for the total bycatch in

(1.2)

with variance

(1.3)

where is the total number of trips in by all vessels.

**General linear mixed effect model**

In a general notion, seabird bycatch (Y) on trip *j* at vessel *i* was modelled according to:

) = and

where and βs represent coefficients under estimation, x1-xn represent candidate variables as described in Table 3, is the random vessel-specific intercept (assumed to be independent and identically distributed as ), and is the random residual variation.
